# Supplementary material
Source: HighWire-hosted journal article supplement (https://mbio.asm.org/content/11/1/e02732-19)
Supplement: inline-supplementary-material-5 [file inline-supplementary-material-5.pdf]

| Use                                                                             | Primer # | Name                  | Primer Sequence                                                 |
|---------------------------------------------------------------------------------|----------|-----------------------|-----------------------------------------------------------------|
| Split N-terminal HA tag                                                         | 1        | RC #1                 | GTTTTTTGACGAGTATGCATATGTATCCTTACGATGTTCC                        |
| Ectopically express HA-Fis1                                                     | 2        | RC #2                 | CGATGTTCCAGATTATGCCGAAGACTCCAACCTCAG                            |
|                                                                                 | 3        | RC #3                 | GCACAACGGTGATTAATTAATTTTTGATAGCGTCCACAA                         |
| Ectopically express HA-Fis1 $\Delta$ TM                                         | 4        | RC #4                 | CGATGTTCCAGATTATGCCGAAGACTCCAACCTCAG                            |
|                                                                                 | 5        | RC #5                 | GCACAACGGTGATTAATTAATTAAGCACGGAGCCAATGAG                        |
| Create Fis1 sgRNA for CRISPR                                                    | 6        | RC #6                 | ACTGGAGTCGGTTTTAGAGCTAGAAATAGCAAG                               |
|                                                                                 | 7        | RC #7                 | TTGAGTATGCAACTTGACATCCCCATTTAC                                  |
| Endogenously tag TGGT1_265180 C-terminus with myc or HA                         | 8        | TgME49_265180 Tag.FOR | TTCCAATCCAATTTAATTAATGAGTACGCAGTGAGCCTTCG                       |
|                                                                                 | 9        | TgME49_265180 Tag.REV | CCACTTCCAATTTAATTAACCAAAATCGAACCTTTCGATGT                       |
| Ectopically express 265180-HA* and 265180 $\Delta$ SID-HA under native promoter | 10       | FIP1 EE.HA.DHFR.F OR  | TTCCAATCCAATTTAATTAATTATCTCCTTTGCGGACGCTAGG                     |
|                                                                                 | 11       | FIP1 no SID.REV       | CCACTTCCAATTTAATTAACTGCTTCGCGTCACTGC                            |
| Knockout of TGGT1_265180 coding sequence                                        | 12       | Fis1.KO.5UTR.FOR      | CGGTATCGATAAGCTTTTTTCGTTGAATCATATCCGCTTTGTCT                    |
|                                                                                 | 13       | Fis1.KO.5UTR.REV      | CGTGCTGATCAAGCTTCTCGTACAGTGCTCACAAAAACGC                        |
|                                                                                 | 14       | Fis1.KO.3UTR.FOR      | AGTTCTAGAGCGGCCGCATGGCGCCCCGGTTATCGGCTG                         |
|                                                                                 | 15       | Fis1.KO.3UTR.REV      | ACCGCGGTGGCGGCCGCAGCGGTATACTAGAGGTCAGCGTACT                     |
| Confirmation of TGGT1_265180 knockout                                           | 16       | Fis1 KO P1.FOR        | TCAAGCAGACGGAGAGGC                                              |
|                                                                                 | 17       | Fis1 KO P1.REV        | CGACGGACTGTCCATACGT                                             |
|                                                                                 | 18       | Fis1 KO P2-3.FOR      | CAACTCACTGACCGCGGT                                              |
|                                                                                 | 19       | Fis1 KO P3.REV        | CAGAAGGGCTGTTGCGAG                                              |
| Targeting to Ku80 site for complementation and ectopic expression               | 20       | IMC2A-CmR [Ku80].F    | GTCCCCGGTTCGCCTCAGCACACACACATGACGTACATCGAAGCTGGGTACCTGTAATTCC   |
|                                                                                 | 21       | IMC2A-CmR [Ku80].R    | GTAATGTCGGAATAGTTCCCATCAGAAACAATGGAGCTATCCGCGTCCCATTGCGCCATTCAG |
| Mutating sgUPRT to sgKu80 for CRISPR/Cas9                                       | 22       | sgKU80.F1             | CTCATATTCGGTTTTAGAGCTAGAAATAGC                                  |
|                                                                                 | 23       | sgKU80.R1             | AAAGGTGTACAACCTTGACATCCCCATTTAC                                 |

Table S2. Primers used in this study. All sequences are 5' to 3'. \*Used TgME49\_265180 Tag.REV as the reverse primer for ectopic expression of 265180-HA
